# Supplementary material
Source: ML conference proceedings conference paper supplement (https://openaccess.thecvf.com/content/ICCV2023/html/Zhu_EgoObjects_A_Large-Scale_ICCV_2023_paper.html)
Supplement: Supplementary file 4 [file Zhu_EgoObjects_A_Large-Scale_ICCV_2023_supplemental.zip]

| L1           | L2       | L3             | L4           | L5      | L6      | L7 |
|--------------|----------|----------------|--------------|---------|---------|----|
| food & drink |          |                |              |         |         |    |
|              | beverage |                |              |         |         |    |
|              |          | alcohol        |              |         |         |    |
|              |          |                | beer         |         |         |    |
|              |          |                | wine         |         |         |    |
|              |          | Coffee         |              |         |         |    |
|              |          |                | coffee beans |         |         |    |
|              |          | tea            |              |         |         |    |
|              |          |                | tea bag      |         |         |    |
|              |          | lemonade       |              |         |         |    |
|              |          | milk           |              |         |         |    |
|              |          | soda (pop)     |              |         |         |    |
|              |          | fruit Juice    |              |         |         |    |
|              | food     |                |              |         |         |    |
|              |          | baked good     |              |         |         |    |
|              |          |                | bread        |         |         |    |
|              |          |                | cake         |         |         |    |
|              |          |                | cookie       |         |         |    |
|              |          |                | doughnut     |         |         |    |
|              |          |                | muffin       |         |         |    |
|              |          | dairy          |              |         |         |    |
|              |          |                | cheese       |         |         |    |
|              |          |                | creamers     |         |         |    |
|              |          |                | ice cream    |         |         |    |
|              |          | egg            |              |         |         |    |
|              |          | meat & seafood |              |         |         |    |
|              |          |                | meat         |         |         |    |
|              |          |                |              | beef    |         |    |
|              |          |                |              | pork    |         |    |
|              |          |                |              | poultry |         |    |
|              |          |                |              |         | chicken |    |

|  |  |                |                              |                          |                           |                |
|--|--|----------------|------------------------------|--------------------------|---------------------------|----------------|
|  |  |                |                              |                          |                           | chicken breast |
|  |  |                |                              |                          |                           | ground chicken |
|  |  |                |                              |                          |                           | whole chicken  |
|  |  |                |                              |                          | cuts of turkey            |                |
|  |  |                |                              |                          |                           | ground turkey  |
|  |  |                |                              |                          |                           | whole turkey   |
|  |  |                |                              |                          | charcuterie (cured meats) |                |
|  |  |                |                              |                          |                           | bacon          |
|  |  |                |                              |                          |                           | sausage        |
|  |  |                | seafood                      |                          |                           |                |
|  |  |                |                              | fish                     |                           |                |
|  |  |                |                              |                          | salmon                    |                |
|  |  |                |                              | shellfish                |                           |                |
|  |  |                |                              |                          | mussel                    |                |
|  |  |                |                              |                          | prawn                     |                |
|  |  |                |                              |                          | scallop                   |                |
|  |  | nuts & seeds   |                              |                          |                           |                |
|  |  |                | nuts                         |                          |                           |                |
|  |  |                |                              | almond                   |                           |                |
|  |  |                |                              | cashew                   |                           |                |
|  |  | pantry staples |                              |                          |                           |                |
|  |  |                | packaged meals & side dishes |                          |                           |                |
|  |  |                |                              | pasta & noodles          |                           |                |
|  |  |                |                              | Box of macaroni & cheese |                           |                |
|  |  | produce        |                              |                          |                           |                |
|  |  |                | fruit                        |                          |                           |                |
|  |  |                |                              | apple                    |                           |                |
|  |  |                |                              | avocado                  |                           |                |
|  |  |                |                              | banana                   |                           |                |
|  |  |                |                              | berry                    |                           |                |
|  |  |                |                              |                          | blackberry                |                |
|  |  |                |                              |                          | blueberry                 |                |

|  |  |  |           |                |            |  |
|--|--|--|-----------|----------------|------------|--|
|  |  |  |           |                | raspberry  |  |
|  |  |  |           |                | strawberry |  |
|  |  |  |           | citrus         |            |  |
|  |  |  |           |                | grapefruit |  |
|  |  |  |           |                | lemon      |  |
|  |  |  |           |                | lime       |  |
|  |  |  |           |                | orange     |  |
|  |  |  |           |                | tangerine  |  |
|  |  |  |           | grape          |            |  |
|  |  |  |           | kiwi           |            |  |
|  |  |  |           | melon          |            |  |
|  |  |  |           |                | cantaloupe |  |
|  |  |  |           |                | honeydew   |  |
|  |  |  |           |                | watermelon |  |
|  |  |  |           | pear           |            |  |
|  |  |  |           | pomegranate    |            |  |
|  |  |  |           | stone fruit    |            |  |
|  |  |  |           |                | apricot    |  |
|  |  |  |           |                | cherry     |  |
|  |  |  |           |                | nectarine  |  |
|  |  |  |           |                | peach      |  |
|  |  |  |           |                | plum       |  |
|  |  |  |           | tropical fruit |            |  |
|  |  |  |           |                | coconut    |  |
|  |  |  |           |                | mango      |  |
|  |  |  |           |                | papaya     |  |
|  |  |  |           |                | pineapple  |  |
|  |  |  | vegetable |                |            |  |
|  |  |  |           | arugula        |            |  |
|  |  |  |           | asparagus      |            |  |
|  |  |  |           | beans          |            |  |
|  |  |  |           | bok choy       |            |  |
|  |  |  |           | broccoli       |            |  |

|  |  |  |  |                  |                  |             |
|--|--|--|--|------------------|------------------|-------------|
|  |  |  |  | brussels sprouts |                  |             |
|  |  |  |  | cabbage          |                  |             |
|  |  |  |  | carrot           |                  |             |
|  |  |  |  | cauliflower      |                  |             |
|  |  |  |  | celery           |                  |             |
|  |  |  |  | chard            |                  |             |
|  |  |  |  | chive            |                  |             |
|  |  |  |  | collard green    |                  |             |
|  |  |  |  | cucumber         |                  |             |
|  |  |  |  | eggplant         |                  |             |
|  |  |  |  | endive           |                  |             |
|  |  |  |  | kale             |                  |             |
|  |  |  |  | lettuce          |                  |             |
|  |  |  |  |                  | butter lettuce   |             |
|  |  |  |  |                  | frisée           |             |
|  |  |  |  |                  | iceberg lettuce  |             |
|  |  |  |  |                  | radicchio        |             |
|  |  |  |  |                  | red leaf lettuce |             |
|  |  |  |  |                  | romaine lettuce  |             |
|  |  |  |  | mushroom         |                  |             |
|  |  |  |  | peppers          |                  |             |
|  |  |  |  |                  | bell pepper      |             |
|  |  |  |  |                  | chili pepper     |             |
|  |  |  |  | pumpkin          |                  |             |
|  |  |  |  | rhubarb          |                  |             |
|  |  |  |  | root vegetable   |                  |             |
|  |  |  |  |                  | beet             |             |
|  |  |  |  |                  | carrot           |             |
|  |  |  |  |                  | carrot           |             |
|  |  |  |  |                  | garlic           |             |
|  |  |  |  |                  | ginger           |             |
|  |  |  |  |                  | onion            |             |
|  |  |  |  |                  |                  | green onion |

|                  |                    |                        |               |         |                 |              |
|------------------|--------------------|------------------------|---------------|---------|-----------------|--------------|
|                  |                    |                        |               |         |                 | yellow onion |
|                  |                    |                        |               |         |                 | red onion    |
|                  |                    |                        |               |         |                 | shallot      |
|                  |                    |                        |               |         | parsnip         |              |
|                  |                    |                        |               |         | potato          |              |
|                  |                    |                        |               |         |                 | potato       |
|                  |                    |                        |               |         |                 | sweet potato |
|                  |                    |                        |               |         | radish          |              |
|                  |                    |                        |               |         | turnip          |              |
|                  |                    |                        |               | tomato  |                 |              |
|                  |                    |                        |               |         | cherry tomato   |              |
|                  |                    |                        |               |         | Red tomato      |              |
|                  |                    |                        |               | spinach |                 |              |
|                  |                    |                        |               | squash  |                 |              |
|                  |                    |                        |               |         | pattypan squash |              |
|                  |                    |                        |               |         | zucchini        |              |
| Health & Medical |                    |                        |               |         |                 |              |
|                  | heart rate monitor |                        |               |         |                 |              |
|                  | Personal Care      |                        |               |         |                 |              |
|                  |                    | Oral Care              |               |         |                 |              |
|                  |                    |                        | dental floss  |         |                 |              |
|                  |                    |                        | toothpaste    |         |                 |              |
|                  |                    |                        | mouthwash     |         |                 |              |
|                  |                    |                        | Toothbrush    |         |                 |              |
|                  |                    | Shaving & Hair removal |               |         |                 |              |
|                  |                    |                        | shaving cream |         |                 |              |
| Home             |                    |                        |               |         |                 |              |
|                  | Home Decor         |                        |               |         |                 |              |
|                  |                    | Plants                 |               |         |                 |              |
|                  |                    |                        | Flower pot    |         |                 |              |
|                  |                    | Candle                 |               |         |                 |              |
|                  |                    | Vase                   |               |         |                 |              |
|                  |                    | Picture frame          |               |         |                 |              |

|  |           |                         |                     |  |  |  |
|--|-----------|-------------------------|---------------------|--|--|--|
|  |           | Pottery                 |                     |  |  |  |
|  |           |                         |                     |  |  |  |
|  | Clock     |                         | Houseplant          |  |  |  |
|  |           | Wall clock              |                     |  |  |  |
|  |           | Alarm clock             |                     |  |  |  |
|  |           | Digital clock           |                     |  |  |  |
|  | Appliance |                         |                     |  |  |  |
|  |           | Small kitchen appliance |                     |  |  |  |
|  |           |                         | Air fryer           |  |  |  |
|  |           |                         | Blender             |  |  |  |
|  |           |                         | Slow cooker         |  |  |  |
|  |           |                         | Deep fryer          |  |  |  |
|  |           |                         | Electric tea kettle |  |  |  |
|  |           |                         | Juicer              |  |  |  |
|  |           |                         | Toaster oven        |  |  |  |
|  |           |                         | Teapot              |  |  |  |
|  |           |                         | Frying pan          |  |  |  |
|  |           |                         | Microwave oven      |  |  |  |
|  |           |                         | Coffeemaker         |  |  |  |
|  |           |                         | Toaster             |  |  |  |
|  |           |                         | Food processor      |  |  |  |
|  |           |                         | Pressure cooker     |  |  |  |
|  |           |                         | Mixer               |  |  |  |
|  |           |                         |                     |  |  |  |
|  |           |                         |                     |  |  |  |
|  |           |                         |                     |  |  |  |
|  |           | Dishwasher              |                     |  |  |  |
|  |           | Oven                    |                     |  |  |  |
|  |           | Refrigerator            |                     |  |  |  |
|  |           | Washing machine         |                     |  |  |  |
|  |           | Gas stove               |                     |  |  |  |
|  |           | Kitchenware             |                     |  |  |  |
|  |           |                         | Coffee cup          |  |  |  |

|  |          |             |                        |  |  |  |
|--|----------|-------------|------------------------|--|--|--|
|  |          |             | Mixing bowl            |  |  |  |
|  |          |             | Kitchen knife          |  |  |  |
|  |          |             | Salt & pepper shakers  |  |  |  |
|  |          |             | Wine Glass             |  |  |  |
|  |          |             | Plate                  |  |  |  |
|  |          |             | Kettle                 |  |  |  |
|  |          |             | Mug                    |  |  |  |
|  |          |             | Bottle                 |  |  |  |
|  |          |             | Water glass            |  |  |  |
|  |          |             | Jug                    |  |  |  |
|  |          |             | Tea cup                |  |  |  |
|  |          |             | Pitcher<br>(Container) |  |  |  |
|  |          |             | Spatula                |  |  |  |
|  |          |             | Bowl                   |  |  |  |
|  |          |             | Ladle                  |  |  |  |
|  |          |             | Spoon                  |  |  |  |
|  |          |             | Chopsticks             |  |  |  |
|  |          |             | Whisk                  |  |  |  |
|  |          |             | Can opener             |  |  |  |
|  |          |             | Cutting board          |  |  |  |
|  |          |             | Fork                   |  |  |  |
|  |          |             | Measuring cup          |  |  |  |
|  |          | Vacuum      |                        |  |  |  |
|  |          |             | Robotic Vacuum         |  |  |  |
|  |          | Bedding     |                        |  |  |  |
|  |          |             | Blanket                |  |  |  |
|  |          |             | Pillow                 |  |  |  |
|  |          | Bathtub     |                        |  |  |  |
|  |          | Window      |                        |  |  |  |
|  |          | Door        |                        |  |  |  |
|  |          | Door handle |                        |  |  |  |
|  | built in |             |                        |  |  |  |

|  |                        |                               |               |  |  |  |
|--|------------------------|-------------------------------|---------------|--|--|--|
|  |                        | Thermostat                    |               |  |  |  |
|  |                        | Countertop                    |               |  |  |  |
|  |                        | Cabinetry                     |               |  |  |  |
|  |                        | Fireplace                     |               |  |  |  |
|  |                        | Light switch                  |               |  |  |  |
|  | home heating & cooling |                               |               |  |  |  |
|  |                        | air conditioner               |               |  |  |  |
|  |                        | air purifier                  |               |  |  |  |
|  |                        | Humidifier                    |               |  |  |  |
|  |                        | Heater                        |               |  |  |  |
|  | Household Supplies     |                               |               |  |  |  |
|  |                        | Paper & Plastic Products      |               |  |  |  |
|  |                        |                               | napkin        |  |  |  |
|  |                        |                               | paper towel   |  |  |  |
|  |                        |                               | toilet tissue |  |  |  |
|  |                        | Disposable food storage       |               |  |  |  |
|  |                        |                               | aluminum foil |  |  |  |
|  |                        | Laundry                       |               |  |  |  |
|  |                        |                               | detergent     |  |  |  |
|  |                        | Picnic basket                 |               |  |  |  |
|  | Furniture              |                               |               |  |  |  |
|  |                        | Chair                         |               |  |  |  |
|  |                        | Shelf                         |               |  |  |  |
|  |                        | Bench                         |               |  |  |  |
|  |                        | Bookcase                      |               |  |  |  |
|  |                        | Kitchen and dining room table |               |  |  |  |
|  |                        | Stool                         |               |  |  |  |
|  |                        | Coffee table                  |               |  |  |  |
|  |                        | Mirror                        |               |  |  |  |
|  |                        | Nightstand                    |               |  |  |  |
|  |                        | Cupboard                      |               |  |  |  |
|  |                        | Loveseat                      |               |  |  |  |
|  |                        | Chest of drawers              |               |  |  |  |



|  |                |                    |                 |  |  |  |
|--|----------------|--------------------|-----------------|--|--|--|
|  |                | Couch              |                 |  |  |  |
|  |                | Drawer             |                 |  |  |  |
|  |                | Sofa bed           |                 |  |  |  |
|  |                | Filing cabinet     |                 |  |  |  |
|  |                | Bathroom cabinet   |                 |  |  |  |
|  |                | Wardrobe           |                 |  |  |  |
|  |                | Closet             |                 |  |  |  |
|  |                | Sofa               |                 |  |  |  |
|  |                | Desk               |                 |  |  |  |
|  | Christmas Tree |                    |                 |  |  |  |
|  | Tools          |                    |                 |  |  |  |
|  |                | Knife              |                 |  |  |  |
|  |                | Wrench             |                 |  |  |  |
|  |                | Scissors           |                 |  |  |  |
|  | Lighting       |                    |                 |  |  |  |
|  |                | Ceiling fan        |                 |  |  |  |
|  |                | Chandelier         |                 |  |  |  |
|  |                | Lamp shade         |                 |  |  |  |
|  |                | Light bulb         |                 |  |  |  |
|  |                | Night light        |                 |  |  |  |
|  |                | Table lamp         |                 |  |  |  |
|  |                | Floor lamp         |                 |  |  |  |
|  |                | Lamp               |                 |  |  |  |
|  | Fan            |                    |                 |  |  |  |
|  |                | Mechanical fan     |                 |  |  |  |
|  | Personal Items |                    |                 |  |  |  |
|  |                | Wallet             |                 |  |  |  |
|  |                | Key                |                 |  |  |  |
|  |                | Financial Document |                 |  |  |  |
|  |                |                    | Receipt         |  |  |  |
|  |                | Identity Document  |                 |  |  |  |
|  |                |                    | Drivers License |  |  |  |
|  |                |                    | passport        |  |  |  |

|  |  |          |                   |            |  |  |
|--|--|----------|-------------------|------------|--|--|
|  |  | Book     |                   |            |  |  |
|  |  | Clothing |                   |            |  |  |
|  |  |          | Shirt             |            |  |  |
|  |  |          | Coat              |            |  |  |
|  |  |          | Suit              |            |  |  |
|  |  |          | Jacket            |            |  |  |
|  |  |          | Shorts            |            |  |  |
|  |  |          | Scarf             |            |  |  |
|  |  |          | Sock              |            |  |  |
|  |  |          | Boot              |            |  |  |
|  |  |          | Jeans             |            |  |  |
|  |  |          | Belt              |            |  |  |
|  |  |          | Cowboy hat        |            |  |  |
|  |  |          | Jewelry           |            |  |  |
|  |  |          |                   | Necklace   |  |  |
|  |  |          |                   | Watch      |  |  |
|  |  |          |                   | Earrings   |  |  |
|  |  |          |                   | Ring       |  |  |
|  |  |          | Fashion accessory |            |  |  |
|  |  |          |                   | Handbag    |  |  |
|  |  |          |                   | Sunglasses |  |  |
|  |  |          |                   | Sun hat    |  |  |
|  |  |          |                   | Glasses    |  |  |
|  |  |          |                   | Goggles    |  |  |
|  |  |          |                   | Tiara      |  |  |
|  |  |          | Shoes             |            |  |  |
|  |  |          |                   | High heels |  |  |
|  |  |          |                   | Sandal     |  |  |
|  |  |          | Luggage           |            |  |  |
|  |  |          |                   | Backpack   |  |  |
|  |  |          |                   | Briefcase  |  |  |
|  |  |          |                   | Suitcase   |  |  |
|  |  | Umbrella |                   |            |  |  |

|               |                    |                            |  |  |  |  |
|---------------|--------------------|----------------------------|--|--|--|--|
|               |                    |                            |  |  |  |  |
|               |                    |                            |  |  |  |  |
|               | Safety             |                            |  |  |  |  |
|               |                    | Fire alarm                 |  |  |  |  |
|               | Home Office        |                            |  |  |  |  |
|               |                    | Whiteboard                 |  |  |  |  |
|               |                    | Post-it                    |  |  |  |  |
|               |                    | Notebook                   |  |  |  |  |
|               |                    | Tablet                     |  |  |  |  |
|               |                    | Calendar                   |  |  |  |  |
|               |                    | Computer keyboard          |  |  |  |  |
|               |                    | Computer monitor           |  |  |  |  |
|               |                    | Computer mouse             |  |  |  |  |
|               |                    | Poster                     |  |  |  |  |
|               |                    | Pen                        |  |  |  |  |
|               |                    | Laptop                     |  |  |  |  |
|               |                    | Laptop charger             |  |  |  |  |
|               |                    | Paper                      |  |  |  |  |
|               |                    | Pencil                     |  |  |  |  |
|               |                    | Stapler                    |  |  |  |  |
|               |                    | Envelope                   |  |  |  |  |
| baby products |                    |                            |  |  |  |  |
|               | Baby Monitor       |                            |  |  |  |  |
|               | Crib               |                            |  |  |  |  |
| beauty        |                    |                            |  |  |  |  |
|               | Bath & body        |                            |  |  |  |  |
|               |                    | bar soap                   |  |  |  |  |
|               |                    | hand soap                  |  |  |  |  |
|               | Hair dryer         |                            |  |  |  |  |
|               |                    |                            |  |  |  |  |
| electronics   |                    |                            |  |  |  |  |
|               | Home Audio & Video |                            |  |  |  |  |
|               |                    | Speaker (stereo equipment) |  |  |  |  |

|            |            |                    |  |  |  |  |
|------------|------------|--------------------|--|--|--|--|
|            |            | Sound bar          |  |  |  |  |
|            |            | Projector          |  |  |  |  |
|            |            | Remote control     |  |  |  |  |
|            |            | Headphones         |  |  |  |  |
|            |            | Cassette Deck      |  |  |  |  |
|            | Television |                    |  |  |  |  |
|            | Phone      |                    |  |  |  |  |
|            |            | Mobile Phone       |  |  |  |  |
|            |            | Phone charger      |  |  |  |  |
|            | Camera     |                    |  |  |  |  |
|            | Ipod       |                    |  |  |  |  |
|            |            |                    |  |  |  |  |
| Recreation |            |                    |  |  |  |  |
|            | Sports     |                    |  |  |  |  |
|            |            | Indoor rower       |  |  |  |  |
|            |            | Dumbbell           |  |  |  |  |
|            |            | Stationary bicycle |  |  |  |  |
|            |            | Treadmill          |  |  |  |  |
|            |            | Bicycle Helmet     |  |  |  |  |
|            |            | Bicycle            |  |  |  |  |
|            |            | Ski                |  |  |  |  |
|            |            | Basketball         |  |  |  |  |
|            |            | Tennis ball        |  |  |  |  |
|            |            | Football           |  |  |  |  |
|            |            | Tennis racket      |  |  |  |  |
|            |            | Volleyball         |  |  |  |  |
|            |            | Golfball           |  |  |  |  |
|            |            | Baseball glove     |  |  |  |  |
|            |            | Football helmet    |  |  |  |  |
|            |            | Roller skates      |  |  |  |  |
|            |            | Baseball bat       |  |  |  |  |
|            |            | Surfboard          |  |  |  |  |
|            |            | Yoga mat           |  |  |  |  |

|         |                    |                     |  |  |  |  |
|---------|--------------------|---------------------|--|--|--|--|
|         |                    | Soccer ball         |  |  |  |  |
|         |                    | Skateboard          |  |  |  |  |
|         | Toy                |                     |  |  |  |  |
|         |                    | Dice                |  |  |  |  |
|         |                    | Flying disc         |  |  |  |  |
|         |                    | Teddy bear          |  |  |  |  |
|         |                    | Doll                |  |  |  |  |
|         |                    | Balloon             |  |  |  |  |
|         | Musical instrument |                     |  |  |  |  |
|         |                    | Violin              |  |  |  |  |
|         |                    | Piano               |  |  |  |  |
|         |                    | Guitar              |  |  |  |  |
|         |                    | Organ               |  |  |  |  |
|         |                    | Drum                |  |  |  |  |
|         |                    | Musical keyboard    |  |  |  |  |
|         | Video Game Console |                     |  |  |  |  |
|         |                    | Game controller/Pad |  |  |  |  |
|         |                    | Playstation         |  |  |  |  |
|         |                    | Xbox                |  |  |  |  |
| Animals |                    |                     |  |  |  |  |
|         | Pet                |                     |  |  |  |  |
|         |                    | Dog                 |  |  |  |  |
|         |                    | Goldfish            |  |  |  |  |
|         |                    | Cat                 |  |  |  |  |
|         |                    | Tortoise            |  |  |  |  |
| Vehicle |                    |                     |  |  |  |  |
|         | Boat               |                     |  |  |  |  |
|         |                    | Canoe               |  |  |  |  |
|         | Bike               |                     |  |  |  |  |
|         | Car                |                     |  |  |  |  |
